# Supplementary material for: Unsafe abortion and abortion-related death among 1.8 million women in India
Source: PubMed Central journal article supplement (PMC6509605; doi:10.1136/bmjgh-2019-001491), 2019-05-02
Supplement: bmjgh-2019-001491supp001.pdf [file bmjgh-2019-001491supp001.pdf]

**Table S1:** Unsafe abortion according to where abortion took place, who performed abortion, and gestation at abortion

|                | Breakup of unsafe abortion according to three criteria | n      | %                |
|----------------|--------------------------------------------------------|--------|------------------|
| <b>Overall</b> | Non-health facility                                    | 55,148 | 94.3 (94.1-94.6) |
|                | Non-SBA                                                | 42,236 | 73.3 (72.8-73.7) |
|                | ≥ 5 months                                             | 2,337  | 2.7 (2.6-2.8)    |

SBA – Skilled birth attendant.

**Table S2:** Description of variables included in the analysis and the order in which variables were added in the multivariable model

| Risk factor analysis (Unsafe abortion, abortion-related death or both) | Independent variables              | Variable description                                                                                                                                                                                                                                                                                                                                   |
|------------------------------------------------------------------------|------------------------------------|--------------------------------------------------------------------------------------------------------------------------------------------------------------------------------------------------------------------------------------------------------------------------------------------------------------------------------------------------------|
| Unsafe abortion                                                        | Family planning                    | <ul style="list-style-type: none"> <li>Binary: Currently using any type of family planning methods at the time of interview; Not using any type of family planning methods</li> </ul>                                                                                                                                                                  |
| Both                                                                   | Place of residence                 | <ul style="list-style-type: none"> <li>Binary: Rural; urban</li> </ul>                                                                                                                                                                                                                                                                                 |
| Both                                                                   | Social group                       | <ul style="list-style-type: none"> <li>Categorical with 3 levels: Schedule tribe (most disadvantaged); Schedule caste; Others (least disadvantaged)</li> <li>Schedule tribe and Schedule caste are officially designated groups of historically disadvantaged populations in India</li> <li>Others refer to the general social class</li> </ul>        |
| Both                                                                   | Religion                           | <ul style="list-style-type: none"> <li>Categorical with 4 levels: Hindu; Muslim (minority); Christian (minority); Others (Sikh, Buddhists etc.)</li> <li>For abortion-related death analysis, religious minorities (Muslim, Christian, and others) were combined to form one category due to a small number of observations for each group.</li> </ul> |
| Both                                                                   | Asset index/ wealth                | <ul style="list-style-type: none"> <li>Quintiles: 5 (richest); 4; 3; 2; 1(poorest)</li> <li>A measurement of household wealth was constructed from the survey data on household assets using Principle Component Analysis (PCA) and is thought to be a good proxy of economic status.</li> </ul>                                                       |
| Unsafe abortion                                                        | Number of total surviving children | <ul style="list-style-type: none"> <li>Categorical with 3 levels: 0; 1-3; 4 or more</li> </ul>                                                                                                                                                                                                                                                         |
| Unsafe abortion                                                        | Proportion of female children      | <ul style="list-style-type: none"> <li>Categorical with 5 levels: 0%; 10-30%; 40-60%; 70-90%; 100%</li> <li>Proportion of surviving female children was calculated using the number of surviving children and female children.</li> </ul>                                                                                                              |
| Both                                                                   | Maternal age (years)               | <ul style="list-style-type: none"> <li>Categorical with 7 levels: 15-19; 20-24; 25-29; 30-34; 35-39; 40-44; ≥ 45</li> </ul>                                                                                                                                                                                                                            |
| Unsafe abortion                                                        | Maternal education status          | <ul style="list-style-type: none"> <li>Categorical with 4 levels: Tertiary and above; Secondary school; Primary school/ below; Illiterate</li> </ul>                                                                                                                                                                                                   |

|                        |                               |                                                                                                           |
|------------------------|-------------------------------|-----------------------------------------------------------------------------------------------------------|
| Unsafe abortion        | Antenatal care use            | <ul style="list-style-type: none"> <li>Binary: Used antenatal care; Did not use antenatal care</li> </ul> |
| Unsafe abortion        | Marital status                | <ul style="list-style-type: none"> <li>Binary: Single; Married</li> </ul>                                 |
| Unsafe abortion        | Maternal employment           | <ul style="list-style-type: none"> <li>Binary: In-paid employment; Not in-paid employment</li> </ul>      |
| Abortion-related death | Gestational month of abortion | <ul style="list-style-type: none"> <li>Binary: &lt; 5 months (20 weeks); ≥ 5 months (20 weeks)</li> </ul> |

**Table S3:** Number and rate of unsafe abortion in nine states in India, using the AHS 2012-2013\*

|                | Women who survived beyond 42 days after the abortion and had sufficient information to examine safety of abortion | Women who had an unsafe abortion | Unsafe abortion rate (95%CI) ** |
|----------------|-------------------------------------------------------------------------------------------------------------------|----------------------------------|---------------------------------|
| <b>Overall</b> | 89,111                                                                                                            | 58,266                           | 67.1 (66.7 to 67.5)             |
| Assam          | 12,251                                                                                                            | 5,123                            | 45.1 (44.0 to 46.2)             |
| Bihar          | 14,491                                                                                                            | 10,808                           | 73.6 (72.7 to 74.4)             |
| Chhattisgarh   | 1,641                                                                                                             | 1,284                            | 78.3 (76.1 to 80.4)             |
| Jharkhand      | 6,173                                                                                                             | 4,630                            | 73.9 (72.6 to 75.2)             |
| Madhya Pradesh | 7,007                                                                                                             | 4,419                            | 63.7 (62.5 to 64.9)             |
| Odisha         | 6,966                                                                                                             | 4,686                            | 68.6 (67.4 to 69.8)             |
| Rajasthan      | 4,878                                                                                                             | 2,699                            | 55.8 (52.1 to 55.4)             |
| Uttarakhand    | 6,464                                                                                                             | 4,132                            | 62.2 (60.4 to 63.9)             |
| Uttar Pradesh  | 29,240                                                                                                            | 20,485                           | 69.3 (68.8 to 69.9)             |

\* Frequencies are unweighted (true counts). Rates/proportions are weighted for survey design and clustering effects.  
\*\* The unsafe abortion rate is the number of unsafe abortion per 100 abortions

**Table S4:** Number and rate of abortion-related death by nine states in India, using the AHS 2012-2013\*

|                | Women who had an abortion, including those who died after having an abortion | Women who died during/after having an abortion | Rate of abortion-related death, % (95%CI) |
|----------------|------------------------------------------------------------------------------|------------------------------------------------|-------------------------------------------|
| <b>Overall</b> | 89,194                                                                       | 253                                            | 0.3 (0.2 to 0.3)                          |
| Assam          | 12,264                                                                       | 42                                             | 0.5 (0.3 to 0.7)                          |
| Bihar          | 14,496                                                                       | 66                                             | 0.4 (0.3 to 0.5)                          |
| Chhattisgarh   | 1,641                                                                        | 17                                             | 1.1 (0.6 to 1.8)                          |
| Jharkhand      | 6,194                                                                        | 18                                             | 0.2 (0.1 to 0.4)                          |
| Madhya Pradesh | 7,014                                                                        | 27                                             | 0.4 (0.3 to 0.6)                          |
| Odisha         | 6,977                                                                        | 7                                              | 0.1 (0.1 to 0.3)                          |

|                                                                                                                                                                                                                         |        |    |                  |
|-------------------------------------------------------------------------------------------------------------------------------------------------------------------------------------------------------------------------|--------|----|------------------|
| Rajasthan                                                                                                                                                                                                               | 4,889  | 8  | 0.1 (0.1 to 0.3) |
| Uttarakhand                                                                                                                                                                                                             | 6,464  | 6  | 0.1 (0.0 to 0.4) |
| Uttar Pradesh                                                                                                                                                                                                           | 29,255 | 62 | 0.2 (0.1 to 0.3) |
| * Frequencies are unweighted (true counts). Rates/proportions are weighted for survey design and clustering effects.<br>** The rate of abortion-related death is the number of abortion-related death per 100 abortions |        |    |                  |

**Table S5:** Sensitivity analysis for unsafe abortion: risk factor analysis for unsafe abortion

|                                   | Adjusted OR (95%CI)<br>Missing indicator<br>(n=89,111) | Adjusted OR (95%CI)<br>Complete case analysis<br>(n=56,093) | Adjusted OR (95%CI)<br>Multiple imputation<br>(n=88,967) |
|-----------------------------------|--------------------------------------------------------|-------------------------------------------------------------|----------------------------------------------------------|
| <b>Maternal age (years)</b>       |                                                        |                                                             |                                                          |
| 15-19                             | 1.09 (1.00 to 1.18)                                    | 1.17 (0.97 to 1.41)                                         | 1.14 (0.97 to 1.33)                                      |
| 20-24                             | 1.13 (1.09 to 1.18)                                    | 1.18 (1.11 to 1.26)                                         | 1.19 (1.13 to 1.25)                                      |
| 25-29                             | 1.00 (ref)                                             | 1.00 (ref)                                                  | 1.00 (ref)                                               |
| 30-34                             | 0.88 (0.84 to 0.92)                                    | 0.88 (0.83 to 0.93)                                         | 0.88 (0.84 to 0.92)                                      |
| 35-39                             | 0.82 (0.78 to 0.87)                                    | 0.87 (0.81 to 0.94)                                         | 0.84 (0.79 to 0.89)                                      |
| 40-44                             | 0.82 (0.75 to 0.89)                                    | 0.90 (0.79 to 1.01)                                         | 0.82 (0.75 to 0.90)                                      |
| ≥ 45                              | 0.95 (0.83 to 1.09)                                    | 0.93 (0.76 to 1.12)                                         | 1.00 (0.85 to 1.18)                                      |
| Missing                           | N/A                                                    | N/A                                                         | N/A                                                      |
| <b>Marital status</b>             |                                                        |                                                             |                                                          |
| Married                           | N/A                                                    | N/A                                                         | N/A                                                      |
| Single                            | N/A                                                    | N/A                                                         | N/A                                                      |
| Missing                           | N/A                                                    | N/A                                                         | N/A                                                      |
| <b>Maternal Education</b>         |                                                        |                                                             |                                                          |
| Tertiary and above                | 1.00 (ref)                                             | 1.00 (ref)                                                  | 1.00 (ref)                                               |
| Secondary school                  | 0.94 (0.88 to 1.00)                                    | 0.90 (0.81 to 1.00)                                         | 0.85 (0.78 to 0.92)                                      |
| Primary school / below            | 1.13 (1.05 to 1.20)                                    | 1.04 (0.93 to 1.17)                                         | 1.04 (0.95 to 1.14)                                      |
| Illiterate                        | 1.48 (1.39 to 1.59)                                    | 1.32 (1.17 to 1.48)                                         | 1.41 (1.29 to 1.55)                                      |
| Missing                           | NA *                                                   | NA                                                          | N/A                                                      |
| <b>Maternal employment status</b> |                                                        |                                                             |                                                          |
| In-paid employment                | N/A                                                    | N/A                                                         | N/A                                                      |
| Not in-paid employment            | N/A                                                    | N/A                                                         | N/A                                                      |
| Missing                           | N/A                                                    | N/A                                                         | N/A                                                      |
| <b>Place of residence</b>         |                                                        |                                                             |                                                          |
| Urban                             | 1.00 (ref)                                             | 1.00 (ref)                                                  | 1.00 (ref)                                               |
| Rural                             | 1.26 (1.21 to 1.32)                                    | 1.35 (1.27 to 1.43)                                         | 1.19 (1.14 to 1.25)                                      |
| Missing                           | N/A                                                    | N/A                                                         |                                                          |
| <b>Religion</b>                   |                                                        |                                                             |                                                          |
| Hindu                             | 1.00 (ref)                                             | 1.00 (ref)                                                  | 1.00 (ref)                                               |
| Muslim                            | 1.16 (1.12 to 1.22)                                    | 1.20 (1.13 to 1.28)                                         | 1.20 (1.14 to 1.27)                                      |
| Christian                         | 1.39 (1.20 to 1.62)                                    | 1.12 (0.89 to 1.40)                                         | 1.24 (1.03 to 1.50)                                      |
| Others                            | 2.05 (1.78 to 2.36)                                    | 1.22 (0.98 to 1.52)                                         | 1.91 (1.61 to 2.27)                                      |
| Missing                           | N/A **                                                 | N/A **                                                      |                                                          |

|                                                                                                                                                                       |                     |                     |                     |
|-----------------------------------------------------------------------------------------------------------------------------------------------------------------------|---------------------|---------------------|---------------------|
| <b>Social group</b>                                                                                                                                                   |                     |                     |                     |
| Others                                                                                                                                                                | 1.00 (ref)          | 1.00 (ref)          | 1.00 (ref)          |
| Schedule caste                                                                                                                                                        | 1.08 (1.04 to 1.12) | 1.04 (0.98 to 1.11) | 1.08 (1.03 to 1.13) |
| Schedule tribe                                                                                                                                                        | 0.86 (0.81 to 0.90) | 0.91 (0.84 to 0.99) | 0.78 (0.74 to 0.84) |
| Missing                                                                                                                                                               | NA*                 | NA                  | N/A                 |
| <b>Wealth/ Asset index</b>                                                                                                                                            |                     |                     |                     |
| 5: Highest                                                                                                                                                            | 1.00 (ref)          | 1.00 (ref)          | 1.00 (ref)          |
| 4                                                                                                                                                                     | 1.08 (1.03 to 1.13) | 1.10 (1.03 to 1.18) | 1.05 (1.00 to 1.11) |
| 3                                                                                                                                                                     | 1.18 (1.13 to 1.24) | 1.20 (1.12 to 1.29) | 1.12 (1.06 to 1.18) |
| 2                                                                                                                                                                     | 1.24 (1.18 to 1.31) | 1.26(1.17 to 1.35)  | 1.18 (1.11 to 1.26) |
| 1: Lowest                                                                                                                                                             | 1.45 (1.38 to 1.53) | 1.45 (1.34 to 1.57) | 1.40 (1.31 to 1.50) |
| Missing                                                                                                                                                               | 1.33 (1.25 to 1.42) | NA                  |                     |
| <b>Antenatal care use</b>                                                                                                                                             |                     |                     |                     |
| No                                                                                                                                                                    | 1.00 (ref)          | 1.00 (ref)          | 1.00 (ref)          |
| Yes                                                                                                                                                                   | 0.69 (0.67 to 0.72) | 0.63 (0.60 to 0.66) | 0.73 (0.70 to 0.76) |
| Missing                                                                                                                                                               | N/A                 | N/A                 | N/A                 |
| <b>Self-reported mental illness</b>                                                                                                                                   |                     |                     |                     |
| No                                                                                                                                                                    | N/A                 | N/A                 | N/A                 |
| Yes                                                                                                                                                                   | N/A                 | N/A                 | N/A                 |
| Missing                                                                                                                                                               | N/A                 | N/A                 | N/A                 |
| <b>Number of surviving children at the point of interview</b>                                                                                                         |                     |                     |                     |
| 0                                                                                                                                                                     | 1.30 (1.16 to 1.46) | 1.33 (1.10 to 1.61) | 1.43 (1.23 to 1.67) |
| 1-3                                                                                                                                                                   | 1.00 (ref)          | 1.00 (ref)          | 1.00 (ref)          |
| 4 or more                                                                                                                                                             | 0.96 (0.91 to 1.00) | 0.88 (0.83 to 0.94) | 0.96 (0.91 to 1.01) |
| Missing                                                                                                                                                               | 0.79 (0.68 to 0.93) | N/A                 | N/A                 |
| <b>Proportion of surviving female children among total surviving children</b>                                                                                         |                     |                     |                     |
| 0%                                                                                                                                                                    | 1.00 (ref)          | 1.00 (ref)          | 1.00 (ref)          |
| 10-30%                                                                                                                                                                | 0.97 (0.92 to 1.03) | 1.03 (0.96 to 1.14) | 1.02 (0.96 to 1.09) |
| 40-60%                                                                                                                                                                | 1.05 (1.00 to 1.10) | 1.08 (1.01 to 1.15) | 1.08 (1.03 to 1.14) |
| 70-90%                                                                                                                                                                | 1.00 (0.94 to 1.06) | 1.04 (0.95 to 1.13) | 1.03 (0.96 to 1.10) |
| 100%                                                                                                                                                                  | 1.12 (1.07 to 1.17) | 1.13 (1.05 to 1.20) | 1.12 (1.06 to 1.18) |
| Missing                                                                                                                                                               | 1.43 (1.23 to 1.66) | N/A                 | N/A                 |
| <b>Family planning (currently at the point of interview)</b>                                                                                                          |                     |                     |                     |
| No                                                                                                                                                                    | 1.00 (ref)          | 1.00 (ref)          | 1.00 (ref)          |
| Yes                                                                                                                                                                   | 0.69 (0.66 to 0.71) | 0.70 (0.67 to 0.73) | 0.65 (0.63 to 0.67) |
| Missing                                                                                                                                                               | 1.02 (0.97 to 1.06) | N/A                 | N/A                 |
|                                                                                                                                                                       |                     |                     |                     |
| * N/As are shown because the OR associated with the missing category was extremely large, which can be explained by the small number of missing values in each group. |                     |                     |                     |
| ** Omitted due to collinearity                                                                                                                                        |                     |                     |                     |

**Table S6:** Sensitivity analysis for abortion-related death: risk factor analysis for abortion-related death

|                                                                                                                                                                                                                                                                                                                                 | <b>Adjusted OR (95%CI)</b><br><b>Complete case analysis</b><br>(n=82,961) | <b>Adjusted OR (95%CI)</b><br><b>Missing indicator</b><br>(n=89,443) | <b>Adjusted OR (95%CI)</b><br><b>Multiple imputation †</b> |
|---------------------------------------------------------------------------------------------------------------------------------------------------------------------------------------------------------------------------------------------------------------------------------------------------------------------------------|---------------------------------------------------------------------------|----------------------------------------------------------------------|------------------------------------------------------------|
| <b>Maternal age (years)</b>                                                                                                                                                                                                                                                                                                     |                                                                           |                                                                      |                                                            |
| 15-19                                                                                                                                                                                                                                                                                                                           | 5.01 (2.91 to 8.62)                                                       | 7.79 (2.73 to 22.23)                                                 | N/A                                                        |
| 20-24                                                                                                                                                                                                                                                                                                                           | 1.14 (0.71 to 1.84)                                                       | 4.29 (2.00 to 9.20)                                                  | N/A                                                        |
| 25-29                                                                                                                                                                                                                                                                                                                           | 1.00 (ref)                                                                | 1.00 (ref)                                                           | N/A                                                        |
| 30-34                                                                                                                                                                                                                                                                                                                           | 1.36 (0.80 to 2.32)                                                       | 1.12 (0.63 to 1.96)                                                  | N/A                                                        |
| 35-39                                                                                                                                                                                                                                                                                                                           | 2.28 (1.34 to 3.90)                                                       | 5.95 (2.11 to 16.81)                                                 | N/A                                                        |
| 40-44                                                                                                                                                                                                                                                                                                                           | 2.13 (1.07 to 4.24)                                                       | 2.07 (1.06 to 4.07)                                                  | N/A                                                        |
| ≥ 45                                                                                                                                                                                                                                                                                                                            | 4.99 (1.92 to 12.96)                                                      | 4.35 (1.77 to 10.67)                                                 | N/A                                                        |
| Missing                                                                                                                                                                                                                                                                                                                         | N/A                                                                       | N/A                                                                  | N/A                                                        |
| <b>Place of residence</b>                                                                                                                                                                                                                                                                                                       |                                                                           |                                                                      |                                                            |
| Urban                                                                                                                                                                                                                                                                                                                           | 1.00 (ref)                                                                | 1.00 (ref)                                                           | N/A                                                        |
| Rural                                                                                                                                                                                                                                                                                                                           | 1.57 (0.91 to 2.69)                                                       | 3.28 (1.76 to 6.11)                                                  | N/A                                                        |
| Missing                                                                                                                                                                                                                                                                                                                         | N/A                                                                       | N/A                                                                  | N/A                                                        |
| <b>Religion</b>                                                                                                                                                                                                                                                                                                                 |                                                                           |                                                                      |                                                            |
| Hindu                                                                                                                                                                                                                                                                                                                           | 1.00 (ref)                                                                | 1.00 (ref)                                                           | N/A                                                        |
| Others                                                                                                                                                                                                                                                                                                                          | 1.22 (0.81 to 1.84)                                                       | 0.94 (0.35 to 2.55)                                                  | N/A                                                        |
| Missing                                                                                                                                                                                                                                                                                                                         | N/A                                                                       | N/A **                                                               | N/A                                                        |
| <b>Social group</b>                                                                                                                                                                                                                                                                                                             |                                                                           |                                                                      |                                                            |
| Others                                                                                                                                                                                                                                                                                                                          | 1.00 (ref)                                                                | 1.00 (ref)                                                           | N/A                                                        |
| Schedule caste                                                                                                                                                                                                                                                                                                                  | 1.05 (0.68 to 1.63)                                                       | 1.25 (0.43 to 3.60)                                                  | N/A                                                        |
| Schedule tribe                                                                                                                                                                                                                                                                                                                  | 1.85 (1.16 to 2.97)                                                       | 4.06 (1.39 to 11.87)                                                 | N/A                                                        |
| Missing                                                                                                                                                                                                                                                                                                                         | N/A                                                                       | N/A *                                                                | N/A                                                        |
| <b>Wealth/ Asset index</b>                                                                                                                                                                                                                                                                                                      |                                                                           |                                                                      |                                                            |
| 5: Highest                                                                                                                                                                                                                                                                                                                      | 1.00 (ref)                                                                | 1.00 (ref)                                                           | N/A                                                        |
| 4                                                                                                                                                                                                                                                                                                                               | 0.75 (0.45 to 1.25)                                                       | 0.65 (0.39 to 1.10)                                                  | N/A                                                        |
| 3                                                                                                                                                                                                                                                                                                                               | 0.86 (0.52 to 1.42)                                                       | 3.81 (1.86 to 7.83)                                                  | N/A                                                        |
| 2                                                                                                                                                                                                                                                                                                                               | 0.94 (0.57 to 1.56)                                                       | 1.33 (0.50 to 3.57)                                                  | N/A                                                        |
| 1: Lowest                                                                                                                                                                                                                                                                                                                       | 0.94 (0.55 to 1.61)                                                       | 2.08 (0.73 to 5.94)                                                  | N/A                                                        |
| Missing                                                                                                                                                                                                                                                                                                                         | N/A                                                                       | 0.33 (0.16 to 0.70)                                                  | N/A                                                        |
| <b>Gestational month</b>                                                                                                                                                                                                                                                                                                        |                                                                           |                                                                      |                                                            |
| < 5 month                                                                                                                                                                                                                                                                                                                       | 1.00 (ref)                                                                | 1.00 (ref)                                                           | N/A                                                        |
| ≥ 5 month                                                                                                                                                                                                                                                                                                                       | 4.35 (2.53 to 7.50)                                                       | 1.58 (0.80 to 3.13)                                                  | N/A                                                        |
| Missing                                                                                                                                                                                                                                                                                                                         | N/A                                                                       | N/A *                                                                | N/A                                                        |
|                                                                                                                                                                                                                                                                                                                                 |                                                                           |                                                                      |                                                            |
| <p>* N/As are shown because the OR associated with the missing category was extremely large, which can be explained by the small number of missing values in each group.<br/> ** Omitted due to collinearity<br/> † N/As are shown because the imputation model did not converge due to the small number of missing values.</p> |                                                                           |                                                                      |                                                            |

**Table S7:** Number and proportion of factors contributing to abortion-related death

| <b>Factors contributing to death</b>                                     | <b>n</b><br>(n=253) | <b>% (95%CI)</b>       |
|--------------------------------------------------------------------------|---------------------|------------------------|
| Delay in receiving health care at facility                               | 79                  | 30.33 (23.81 to 37.76) |
| Inadequate care at health facility                                       | 47                  | 19.17 (13.96 to 25.75) |
| Seriousness of the condition not realised                                | 49                  | 17.63 (12.70 to 23.94) |
| Lack of funds                                                            | 28                  | 13.11 (8.78 to 19.14)  |
| Lack of transport to facility                                            | 19                  | 6.78 (4.10 to 11.01)   |
| Seriousness of condition realised but no decision made by family members | 14                  | 6.48 (3.64 to 11.28)   |
| Others                                                                   | 17                  | 6.50 (3.69 to 11.21)   |

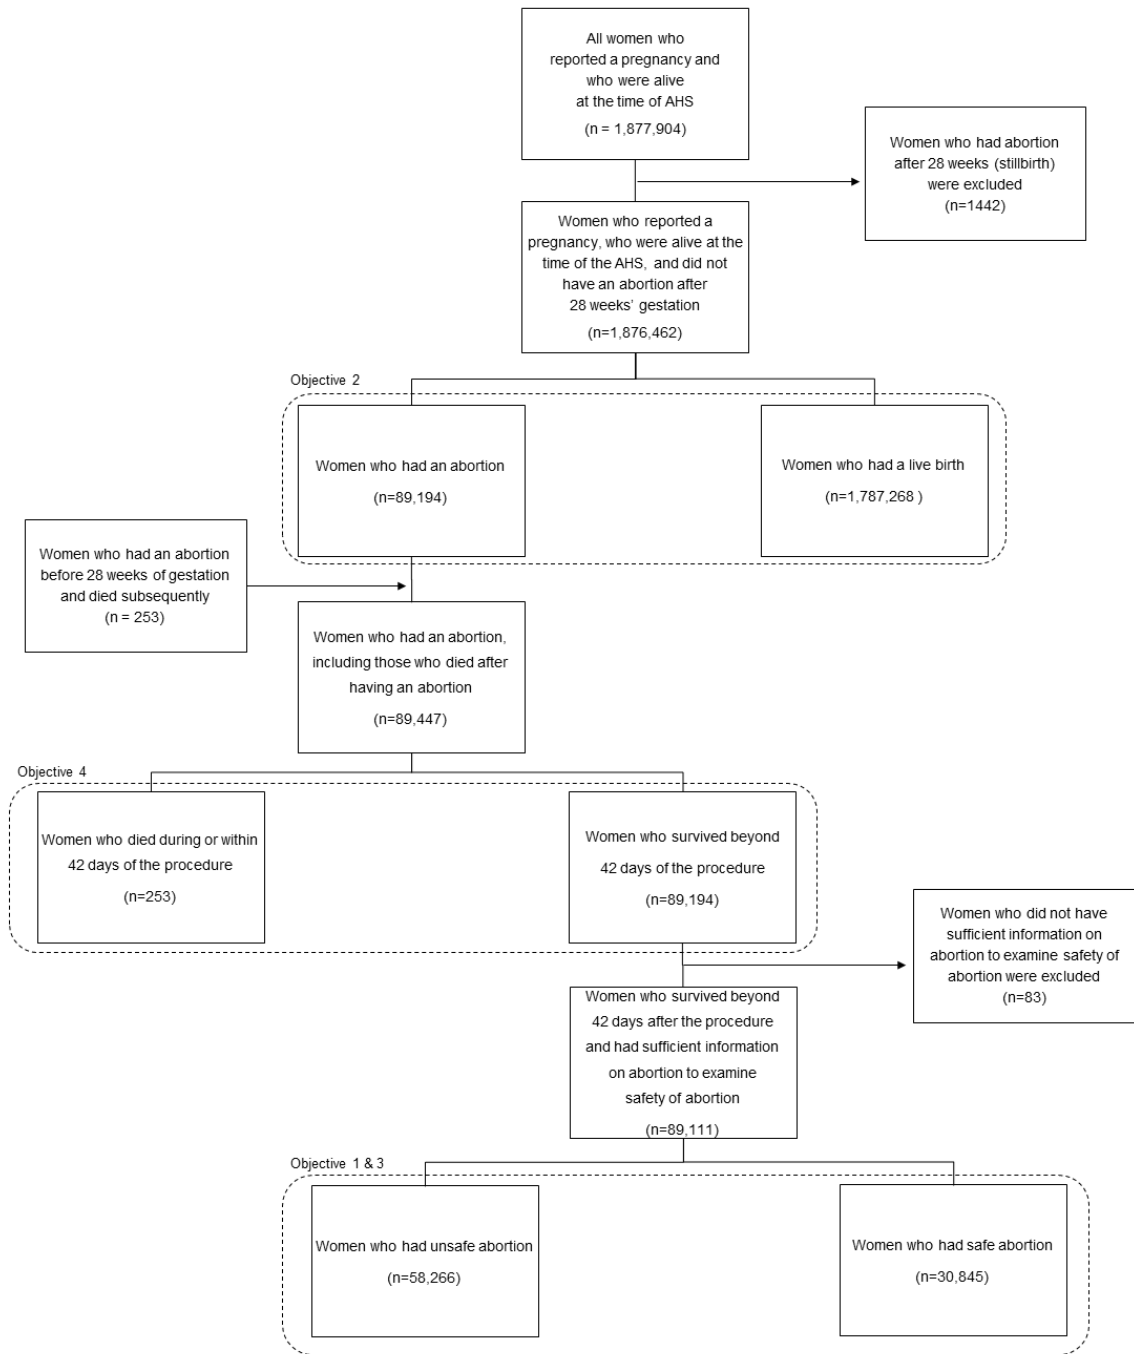

Figure S1: Flow-chart showing the derivation of study sample





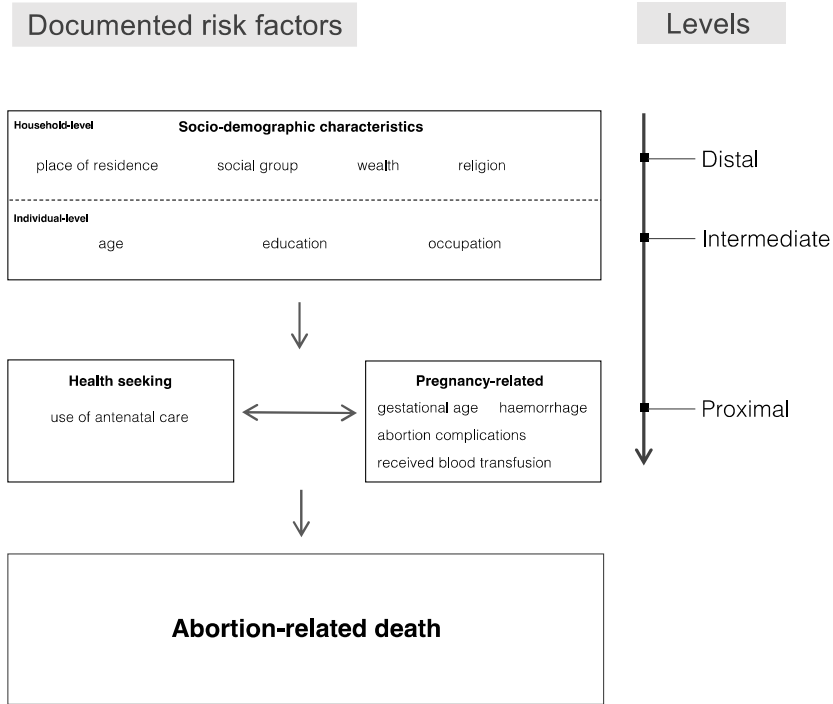

Figure S3: Conceptual framework – risk factors for abortion-related maternal death

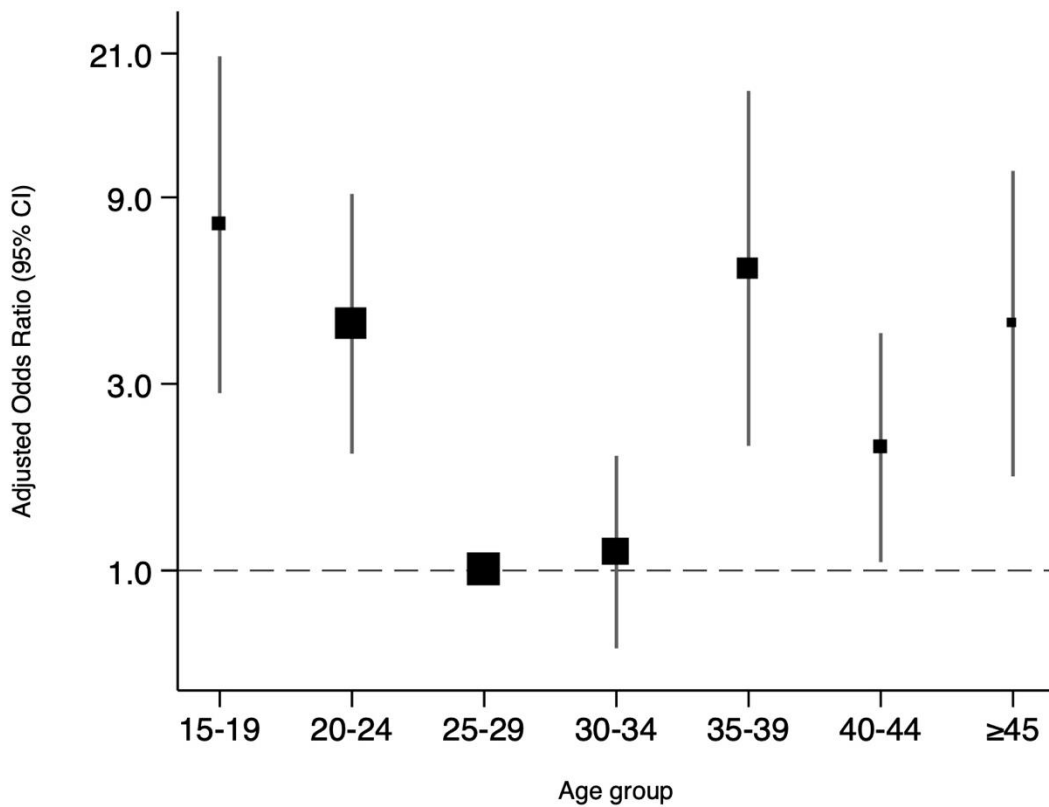

Figure S4: Association of maternal age with abortion-related death
